# Supplementary material for: Microwave-assisted synthesis of BiOBr/graphene nanocomposites and their enhanced photocatalytic activity
Source: Royal Society of Chemistry journal article supplement (doi:10.1039/c2dt31088k), 2012-01-01
Supplement: c2dt31088k.pdf [file c2dt31088k.pdf]

## Electronic Supplementary Information

### Microwave-assisted synthesis of BiOBr/graphene nanocomposites and their enhanced photocatalytic activity

Shuyan Song,<sup>a</sup> Wei Gao,<sup>a</sup> Xiao Wang,<sup>a,b</sup> Xiyan Li,<sup>a,b</sup> Dapeng Liu,<sup>a</sup> Yan Xing,<sup>a</sup>  
Hongjie Zhang<sup>\*a</sup>

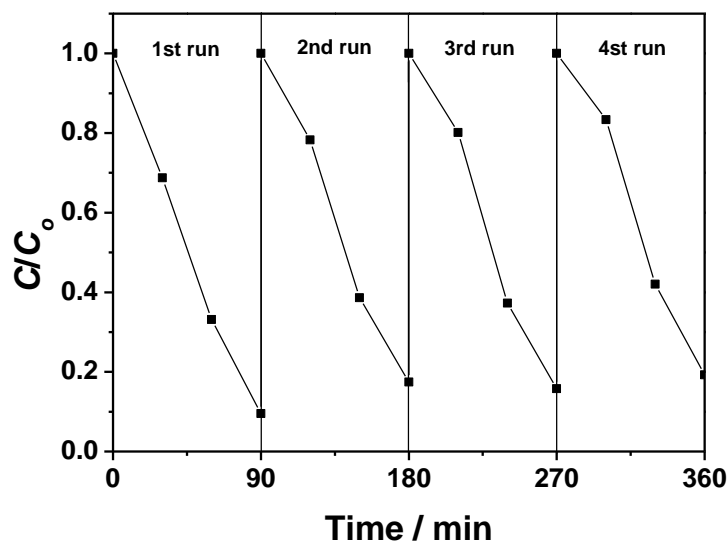

Fig. S1. Reuse activity of the sample with 1% graphene.
